# Supplementary material for: Ion-cluster-mediated ultrafast self-healable ionoconductors for reconfigurable electronics
Source: PubMed Central journal article supplement (PMC9247092; doi:10.1038/s41467-022-31553-4), 2022-06-30
Supplement: 41467_2022_31553_MOESM1_ESM.pdf [file 41467_2022_31553_MOESM1_ESM.pdf]

Supplementary Information for

**Ion-Cluster-Mediated Ultrafast Self-Healable Ionoconductors for Reconfigurable Electronics**

*Yong Min Kim,<sup>1</sup> Jin Han Kwon,<sup>1</sup> Seonho Kim,<sup>2</sup> U Hyeok Choi,<sup>2</sup> and Hong Chul Moon<sup>1,\*</sup>*

<sup>1</sup>Department of Chemical Engineering, University of Seoul, Seoul 02504, Republic of Korea

<sup>2</sup>Department of Polymer Science and Engineering and Program in Environmental and Polymer Engineering, Inha University, Incheon 22212, Republic of Korea

\*Corresponding author: H.C.M (hcmoon@uos.ac.kr)

**This PDF file includes:**

Supplementary Table 1 to 3

Supplementary Figure 1 to 26

Supplementary Reference 1 to 29

**Other Supplementary Materials for this manuscript include the following :**

Supplementary Movie 1 to 6

**Supplementary Table 1** Molecular characterizations of polymers prepared in this work.

| Code     | $M_w$<br>(g mol <sup>-1</sup> ) <sup>a</sup> | $M_n$<br>(g mol <sup>-1</sup> ) <sup>a</sup> | Polydispersity<br>index ( $\mathcal{D}$ ) <sup>a</sup> | Mole fraction of<br>hydroxyl parts (%) <sup>b</sup> |
|----------|----------------------------------------------|----------------------------------------------|--------------------------------------------------------|-----------------------------------------------------|
| 100-AAHA | 946,000                                      | 430,000                                      | 2.2                                                    | 0                                                   |
| 92-AAHA  | 1,274,000                                    | 490,000                                      | 2.6                                                    | 8                                                   |
| 61-AAHA  | 1,250,600                                    | 481,000                                      | 2.6                                                    | 39                                                  |
| 90-DAHA  | 898,700                                      | 473,000                                      | 1.9                                                    | 10                                                  |

<sup>a</sup>Measured by SEC with poly(ethylene oxide) standards; <sup>b</sup>Determined by <sup>1</sup>H NMR spectroscopy.

**Supplementary Table 2** Comparison of healing mechanism, efficiency, temperature, and mechanical properties (Young's modulus and fracture strain) of previously reported self-healing platforms, including ionogels, hydrogels, and elastomers.

| Materials                                                                                                            | Type      | Healing Mechanism                                  | Healing Efficiency (%) | Healing Time (h) | Healing Temperature (°C) | Young's Modulus (MPa) | Fracture Strain (%) | Ref. |
|----------------------------------------------------------------------------------------------------------------------|-----------|----------------------------------------------------|------------------------|------------------|--------------------------|-----------------------|---------------------|------|
| PAAm <sup>a</sup> /PNAGA <sup>b</sup>                                                                                | Hydrogel  | hydrogen bond                                      | N.A.                   | 0.5              | 90                       | 0.048                 | 665                 | 1    |
| UPyHCBA <sup>c</sup>                                                                                                 | Hydrogel  | hydrophobic interaction, hydrogen bond             | N.A.                   | 0.042            | 25                       | 0.0017                | 1000                | 2    |
| PAAc <sup>d</sup> /CTA <sup>e</sup>                                                                                  | Hydrogel  | hydrophobic interaction                            | 75                     | 0.5              | 80                       | 0.016                 | 900                 | 3    |
| MPTC <sup>f</sup> /NaSS <sup>g</sup> /DMAEA <sup>h</sup> /BIS <sup>i</sup> copolymer                                 | Hydrogel  | electrostatic interaction                          | 75                     | 0.125            | 25                       | 0.036                 | 650 <sup>a</sup>    | 4    |
| P(NaSS- <i>co</i> -DMAEA-Q)                                                                                          | Hydrogel  | electrostatic interaction                          | 82.3                   | 24               | 25                       | 0.08                  | 1000                | 5    |
| Zwitterionic nanocomposite hydrogel                                                                                  | Hydrogel  | electrostatic interaction                          | 74                     | 24               | 25                       | 0.0046 <sup>x</sup>   | 2000                | 6    |
| Agel <sup>j</sup> -DCMC <sup>k</sup> hydrogel                                                                        | Hydrogel  | imine bond                                         | 90                     | 1                | 37                       | 0.03                  | 140                 | 7    |
| P(AM- <i>co</i> -AEAM <sup>l</sup> ) hydrogel                                                                        | Hydrogel  | hydrogen bond, ionic interaction, Schiff base bond | 53                     | 48               | 25                       | 0.02 <sup>x</sup>     | 1205                | 8    |
| P(Urea-IL <sup>m</sup> -SPMA <sup>n</sup> )                                                                          | Hydrogel  | electrostatic interaction, hydrogen bond           | 91                     | 24               | 25                       | 0.18                  | 720                 | 9    |
| hyperbranched polyurethane (HPDU)                                                                                    | Elastomer | hydrogen bond                                      | 96.5                   | 10               | 90                       | 0.8 <sup>x</sup>      | 3100                | 10   |
| Dopamine acrylamide/butyl acrylate/Ca <sup>2+</sup>                                                                  | Elastomer | hydrogen bond, metal coordination                  | 37                     | 24               | 25                       | 3.9                   | 310                 | 11   |
| poly(AAm/ChCl <sup>o</sup> - <i>co</i> -MA <sup>p</sup> /ChCl)                                                       | Elastomer | hydrogen bond                                      | 91                     | 72               | 20                       | 0.1                   | 450                 | 12   |
| polyurethane acrylate                                                                                                | Elastomer | disulfide bond hydrogen bond                       | 95                     | 12               | 80                       | 0.5 <sup>x</sup>      | 400                 | 13   |
| polyurethane (DA-PU)                                                                                                 | Elastomer | hydrogen bond, donor-acceptor interaction          | 97                     | 6.67             | 60                       | 1.33 <sup>x</sup>     | 1900                | 14   |
| PU-HEDS <sup>q</sup> -400                                                                                            | Elastomer | hydrogen bond, disulfide bond                      | 95.4                   | 24               | 50                       | 5.04                  | 553                 | 15   |
| Fe-Hpdca <sup>r</sup> -PDMS                                                                                          | Elastomer | metal-ligand interaction                           | 90.3                   | 48               | 25                       | 0.54                  | 1700                | 16   |
| cellulose nanocrystal/[BMIM][HSO <sub>4</sub> ] composite                                                            | Ion gel   | electrostatic interaction                          | 90.3                   | 24               | 25                       | 0.016                 | 620                 | 17   |
| PS <sup>s</sup> - <i>b</i> -P(DMAAm <sup>t</sup> - <i>r</i> -AAc)/[EMI][TFSI]                                        | Ion gel   | hydrogen bond                                      | 90                     | 3                | 25                       | 0.5 <sup>x</sup>      | 400                 | 18   |
| TetraPEG-Ant <sup>u</sup> /[EMI][TFSI]                                                                               | Ion gel   | photoisomerization                                 | 66                     | 10               | 150                      | 0.007 <sup>x</sup>    | 950                 | 19   |
| P(AzoMA- <i>r</i> -NIPAm)- <i>b</i> -PEO- <i>b</i> -P(AzoMA- <i>r</i> -NIPAm) <sup>v</sup> /[BMIM][PF <sub>6</sub> ] | Ion gel   | photoisomerization                                 | 81                     | 64               | 36                       | 0.02 <sup>x</sup>     | 450                 | 20   |

|                                                    |                |                        |             |                     |           |                |             |                  |
|----------------------------------------------------|----------------|------------------------|-------------|---------------------|-----------|----------------|-------------|------------------|
| PVDF- <i>co</i> -HFP <sup>w</sup> -5545/[EMI][OTf] | Ion gel        | ion-dipole interaction | 100.3       | 6                   | 50        | 0.10           | 1500        | 21               |
| PVDF- <i>co</i> -HFP-5545/[EMI][TFSI]              | Ion gel        | ion-dipole interaction | 99.1        | 24                  | 50        | 0.21           | 2000        | 22               |
| Cellulose/[BMI][Cl]                                | Ion gel        | hydrogen bond          | 96          | 2                   | 25        | 1 <sup>x</sup> | 60          | 23               |
|                                                    |                |                        | <b>90.3</b> | <b>0.016 (1min)</b> |           |                |             |                  |
| <b>92-AAHA-IL</b>                                  | <b>Ion gel</b> | <b>ion cluster</b>     | <b>98.7</b> | <b>0.050 (3min)</b> | <b>25</b> | <b>0.84</b>    | <b>1130</b> | <b>This work</b> |
|                                                    |                |                        | <b>99.7</b> | <b>0.083 (5min)</b> |           |                |             |                  |

<sup>a</sup>PAAm: poly(acrylamide), <sup>b</sup>PNAGA: poly(*N*-acryloyl glycinamide), <sup>c</sup>UPyHCBA: 4-(6-(3-(6-methyl-4-oxo-1,4-dihydropyrimidin-2-yl)ureido)hexylcarbamoyloxy)butyl acrylate, <sup>d</sup>PAAc: poly(acrylic acid), <sup>e</sup>CTA: cetyltrimethylammonium, <sup>f</sup>MPTC: [3-(methacryloylamino)propyl]trimethylammonium chloride, <sup>g</sup>NaSS: sodium p-styrenesulfonate hydrate, <sup>h</sup>DMAEA: 2-(dimethylamino)-ethyl methacrylate, <sup>i</sup>BIS: N,N'-methylenebis(acrylamide), <sup>j</sup>Agel: amino-gelatin, <sup>k</sup>DCMC: dialdehyde carboxymethyl cellulose, <sup>l</sup>AEAM: 2-aminoethyl acrylamide hydrochloride, <sup>m</sup>Urea-IL: imidazolium-based ionic liquid (IL) monomers with urea groups, <sup>n</sup>SPMA: 3-sulfopropyl methacrylate potassium salt, <sup>o</sup>ChCl: choline chloride, <sup>p</sup>MA: maleic acid, <sup>q</sup>HEDS: 2,2'-hydroxy ethyldisulfide, <sup>r</sup>Hpdca: 2,6-pyridinedicarboxamide, <sup>s</sup>PS: poly(styrene), <sup>t</sup>DMAAm: N,N-dimethylacrylamide, <sup>u</sup>TetraPEG-Ant: tetra-arm poly(ethylene glycol)-anthracene, <sup>v</sup>P(AzoMA-*r*-NIPAm)-*b*-PEO-*b*-P(AzoMA-*r*-NIPAm): Poly(4-phenylazophenyl methacrylate-*random*-N-isopropylacrylamide)-*block*-poly(ethylene oxide)-*block*-P(4-phenylazophenyl methacrylate-*random*-N-isopropylacrylamide), <sup>w</sup>PVDF-*co*-HFP: Poly(vinylidene fluoride-*co*-hexafluoropropylene). <sup>x</sup>calculated from produced stress-strain curve.

**Supplementary Table 3** Vogel-Fulcher-Tammann (VFT) temperature fitting parameters of temperature dependence of the  $\alpha_2$  process.

| Sample     | $\log(\omega_\infty)$<br>(rad s <sup>-1</sup> ) | $D$ | $T_0$<br>(K) | $T_g^a$<br>(K) | $E_a$<br>(kJ/mol) |
|------------|-------------------------------------------------|-----|--------------|----------------|-------------------|
| 92-AAHA-IL | 10.6                                            | 6   | 171          | 256            | 9                 |
| 90-DAHA-IL | 12.6                                            | 11  | 165          | 250            | 15                |

---

<sup>a</sup>Obtained from DSC thermograms (Supplementary Fig. 7).

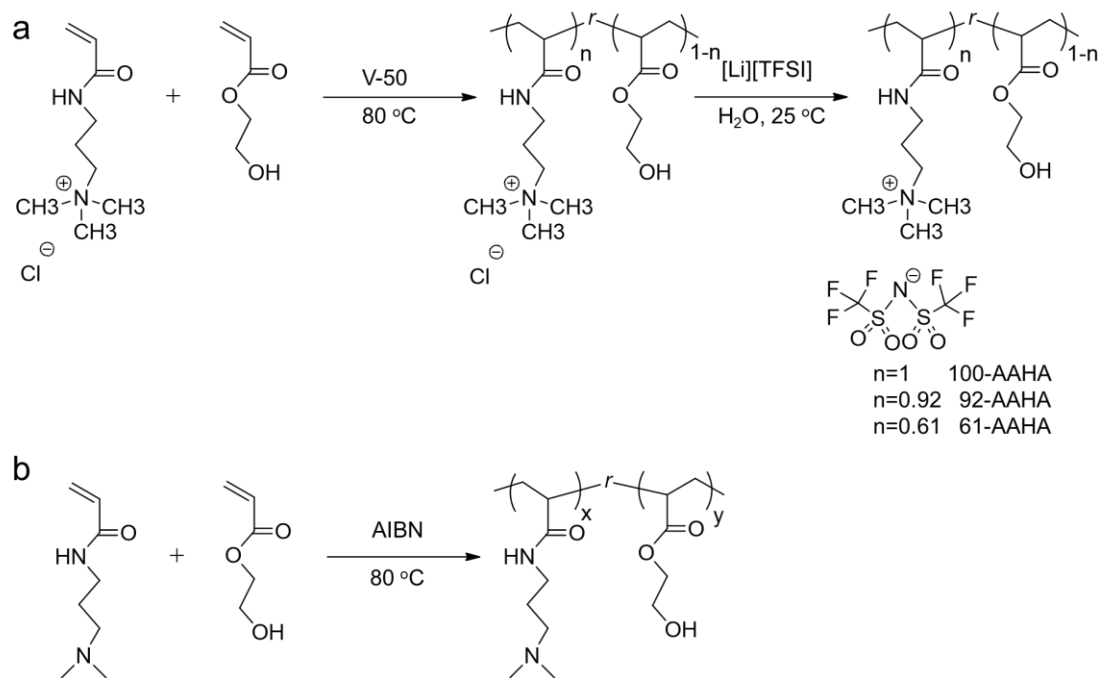

**Supplementary Fig. 1 Synthetic strategy for copolymers employed in this work.** Synthetic routes for preparing **a** AAHAs and **b** DAHA.

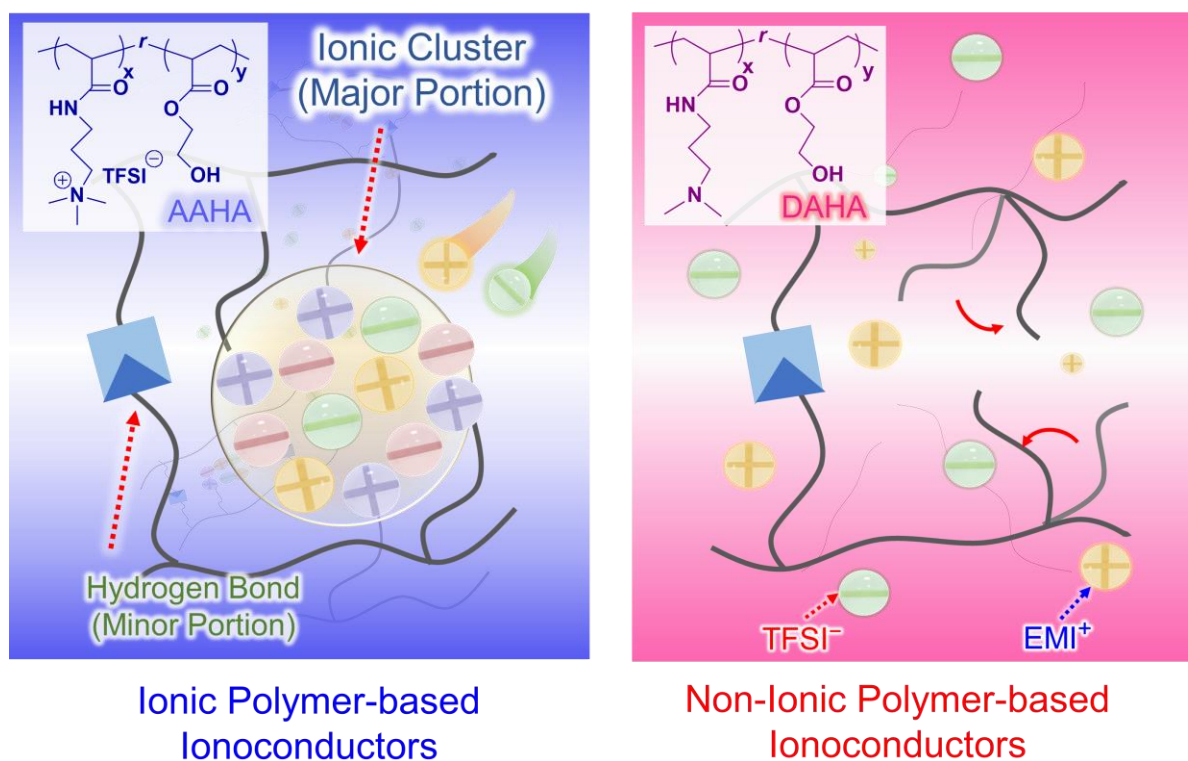

**Supplementary Fig. 2 Difference in molecular interaction depending on the presence of ionic moiety.** Schematic illustrations of ionic polymer-based ionoconductor (92-AAHA-IL), in which both hydrogen bonding and ion-cluster formation take place, and non-ionic polymer-based ionoconductors (90-DAHA-IL) only including hydrogen bonding interactions.

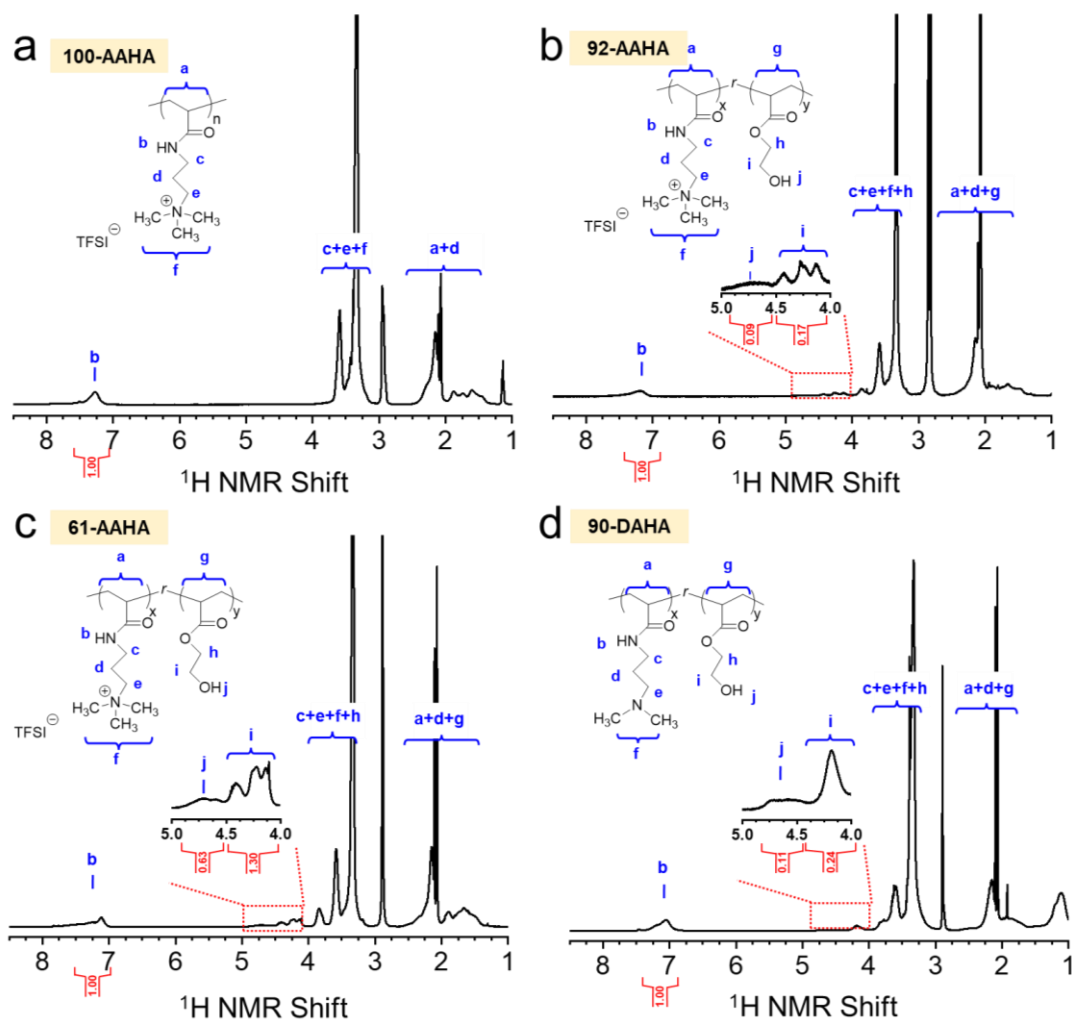

**Supplementary Fig. 3 Structural analysis of used polymers.**  $^1\text{H}$  NMR spectra of prepared polymers. **a** 100-AAHA, **b** 92-AAHA, **c** 61-AAHA, and **d** 90-DAHA.



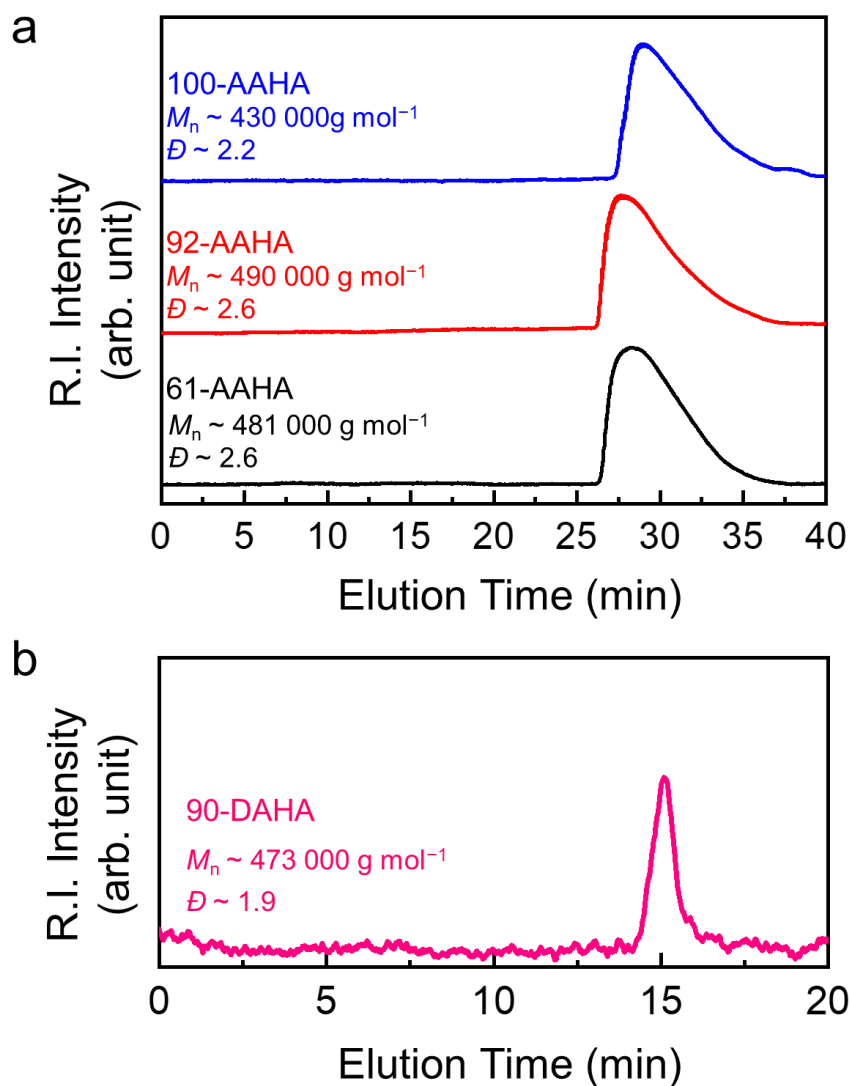

**Supplementary Fig. 4 Molecular characteristics of used polymers.** SEC traces of polymers employed in this study. **a** 100-AAHA, 92-AAHA, and 61-AAHA. To prepare the GPC samples, the synthesized AAHAs were dissolved in an aqueous buffer (pH = 3) containing 0.1 M sodium phosphate, and the operating flow rate was fixed at  $0.5\text{ mL min}^{-1}$ . **b** SEC trace of 90-DAHA dissolved in HPLC water with a flow rate of  $1.0\text{ mL min}^{-1}$ . All samples were calibrated with poly(ethylene oxide) standards.

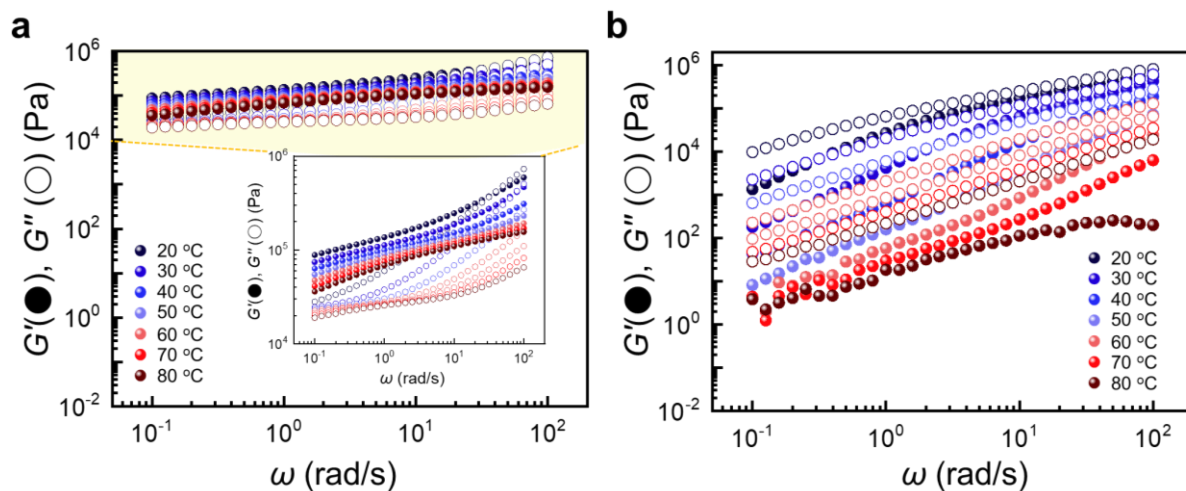

**Supplementary Fig. 5 Difference in rheological behaviors.** Frequency-dependent dynamic storage (filled circle) and loss (open circle) moduli at various temperatures for **a** 92-AAHA-IL and **b** 90-DAHA-IL.

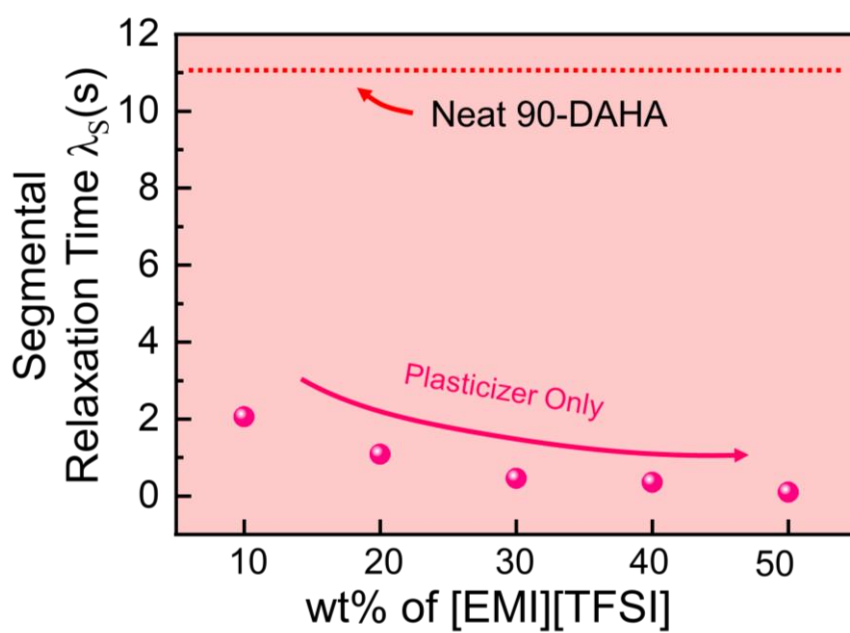

**Supplementary Fig. 6 Effect of [EMI][TFSI] on non-ionic polymer-based system.** Changes in segmental relaxation time of 90-DAHA-IL according to the weight fraction of the introduced [EMI][TFSI]. The red dotted-line indicates the segmental relaxation time of neat 90-DAHA.

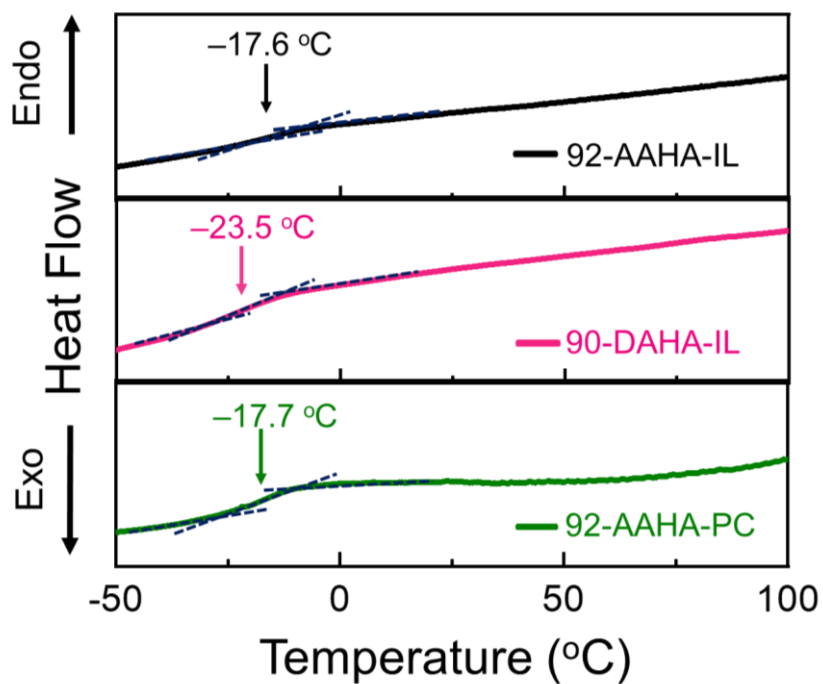

**Supplementary Fig. 7 Thermal properties of various ionoconductors with different copolymers.** DSC thermograms of 92-AAHA-IL, 90-DAHA-IL, and 92-AAHA-PC, obtained during the second run at a heating rate of 10 °C min<sup>-1</sup>.

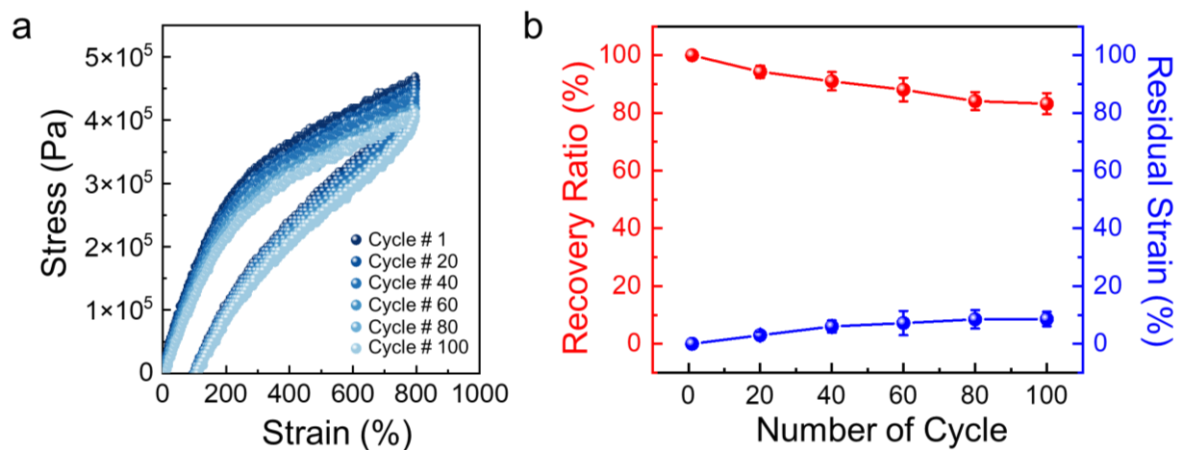

**Supplementary Fig. 8 Mechanical stability of 92-AAHA-IL.** **a** Stress-strain curves during cyclic stretching/releasing at 800% and **b** corresponding changes in recovery ratio and residual strain. The recovery ratio of ~83.2% and residual strain of ~8.6% after 100 consecutive cycles represent the high mechanical reliability of 92-AAHA-IL. Error bars indicate standard deviation.

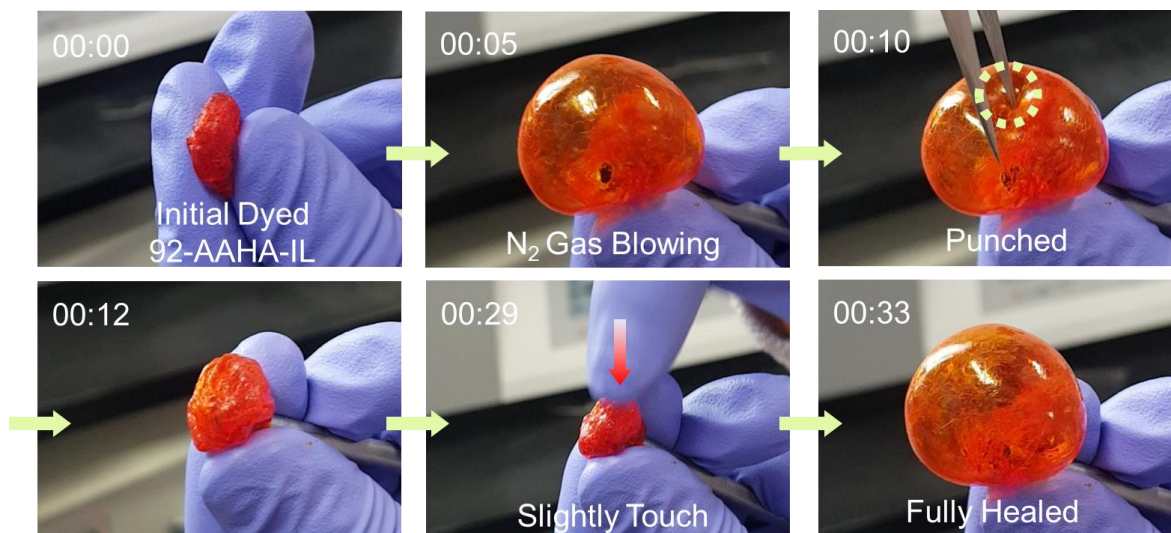

**Supplementary Fig. 9 Demonstration of ultrafast self-healing performance of 92-AAHA-IL.** Snapshots from Supplementary Movie 1 showing the immediate self-healing capability of 92-AAHA-IL. The balloon-shaped 92-AAHA-IL was expanded by blowing N<sub>2</sub> gas and punched with a tweezer to induce mechanical damage. After self-healing with a slight touch to contact the injured region, 92-AAHA-IL fully prevented the leakage of N<sub>2</sub> molecules.

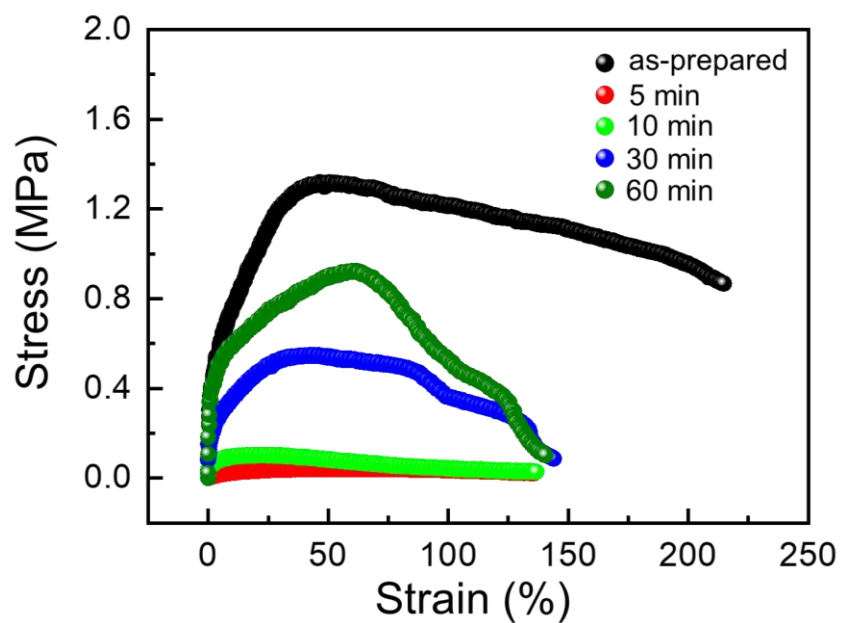

**Supplementary Fig. 10 Correlation between healing time and mechanical properties of 90-DAHA-IL.** Tensile stress-strain curves of as-prepared and healed 90-DAHA-IL (5–60 mins) at 25°C.

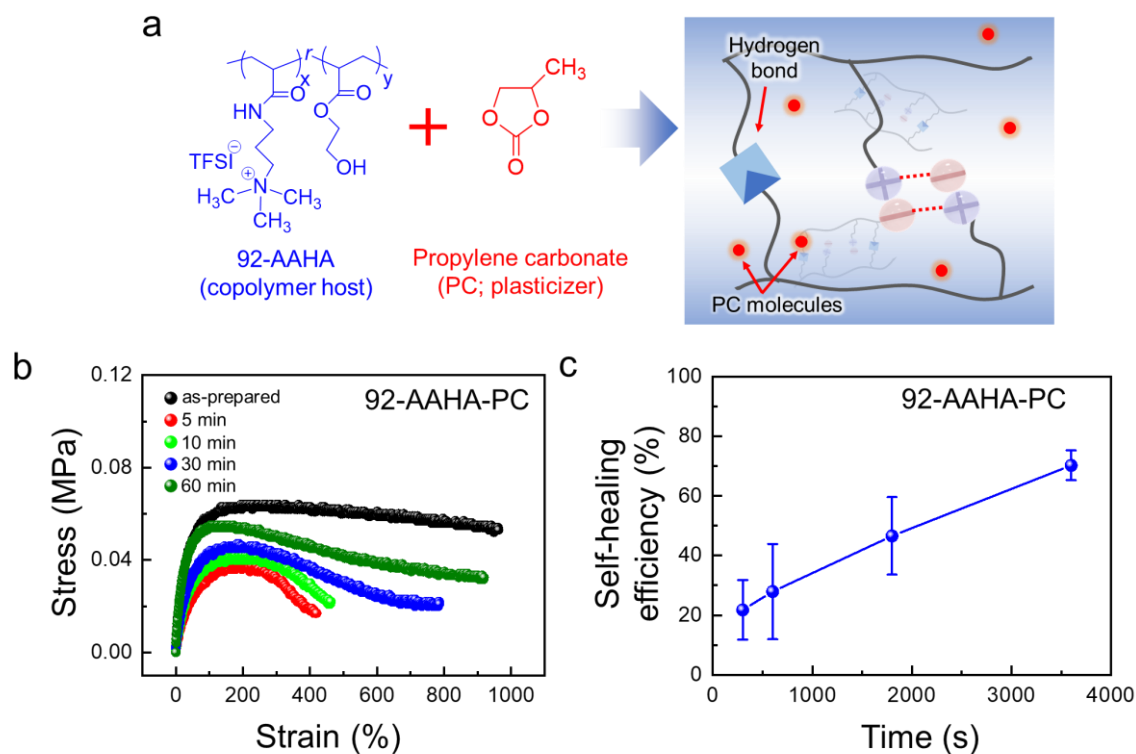

**Supplementary Fig. 11 Mechanical and self-healing characteristics of the system with no ionic liquids.** **a** Schematic illustration of 92-AAHA-PC. **b** Tensile stress–strain curves for self-healing tests of 92-AAHA-PC at 25 °C, and **c** self-healing efficiency as a function of healing time. The self-healing efficiency was calculated from the ratio of the toughness values before damage and after healing obtained from the stress–strain curves. Error bars indicate standard deviation.



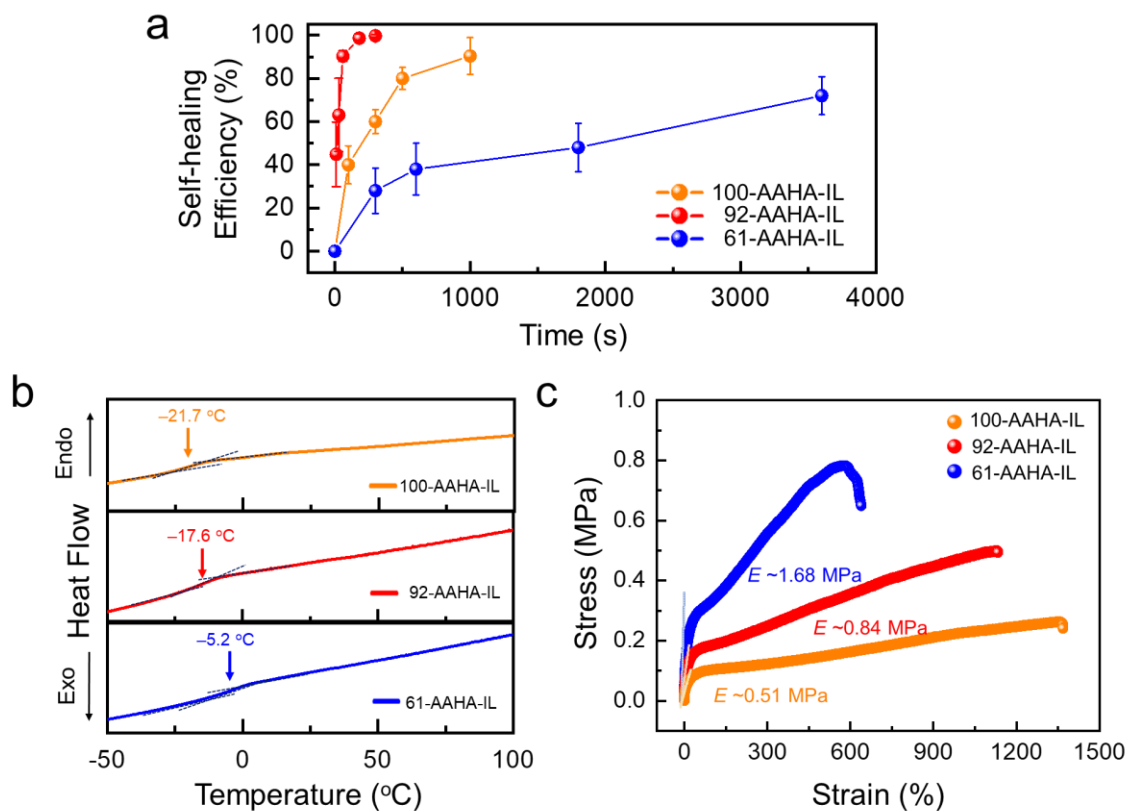

**Supplementary Fig. 12 Dependence of self-healing, thermal, and mechanical performance on the ionic content in AAHA-IL.** **a** Differences in self-healing efficiencies measured with different copolymer hosts. Error bars indicate standard deviation. **b** DSC thermograms for evaluating  $T_g$  values. **c** Tensile stress–strain curves for determining elastic moduli of 100-AAHA-IL, 92-AAHA-IL, and 61-AAHA-IL.

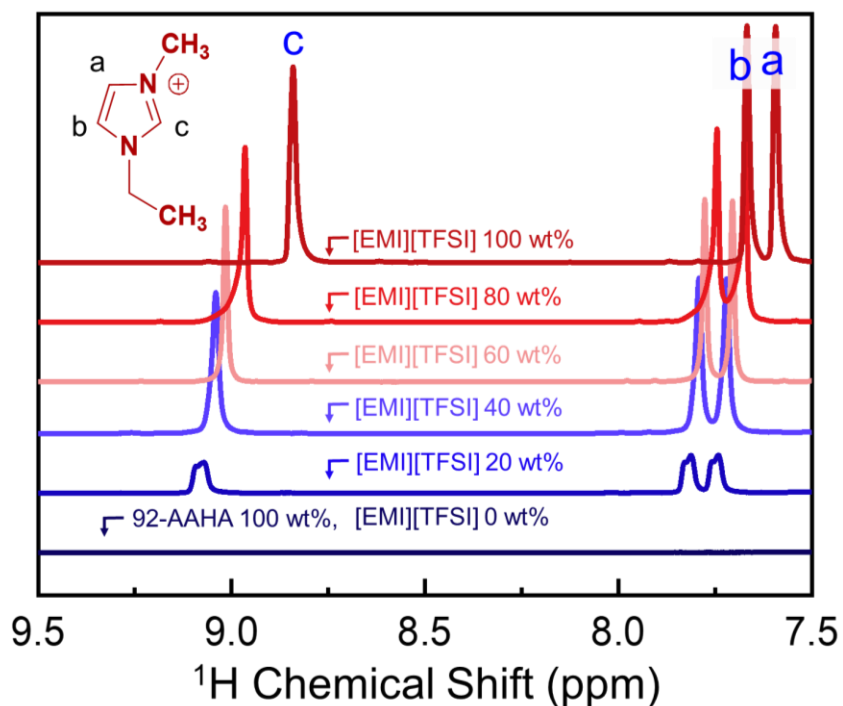

**Supplementary Fig. 13 Interaction between [EMI][TFSI] and 92-AAHA.**  $^1\text{H}$  NMR spectra of [EMI][TFSI] with various 92-AAHA-IL contents. The contents of [EMI][TFSI] were 0 (navy line, neat 92-AAHA), 20, 40, 60, 80, and 100 wt.% (red line, neat [EMI][TFSI]). The representative [EMI]<sup>+</sup> peaks were slightly shifted when the 92-AAHA was added, but no peaks below 7.5–9.5 ppm were observed for neat 92-AAHA.

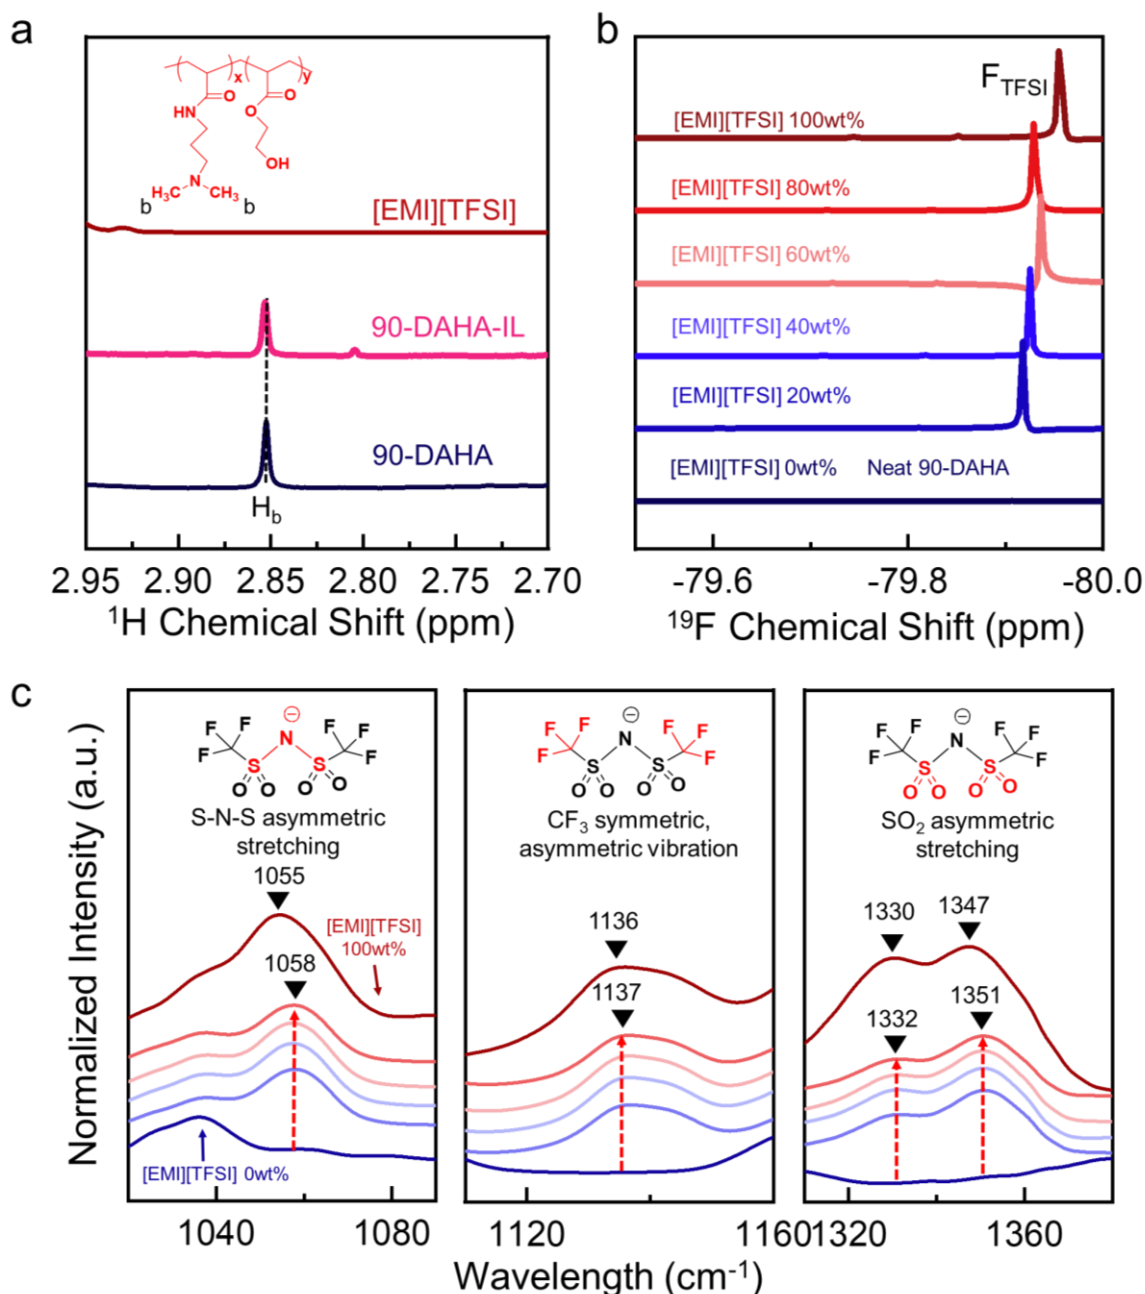

**Supplementary Fig. 14 Spectroscopic analysis of 90-DAHA-containing system.** **a** Comparison of  $^1\text{H}$  NMR spectra of 90-DAHA, 90-DAHA-IL, and [EMI][TFSI]. 90-DAHA-IL contained 30 wt.% [EMI][TFSI]. **b**  $^{19}\text{F}$  NMR spectra of 90-DAHA-IL with various [EMI][TFSI] contents. No  $[\text{TFSI}]^-$  peak was observed for neat 90-DAHA. **c** Changes in FTIR absorption peaks with respect to the fraction of  $[\text{TFSI}]^-$  in 90-DAHA-IL. The contents of [EMI][TFSI] were 0 (navy line, neat 90-DAHA), 20, 40, 60, 80, and 100 wt.% (red line, neat [EMI][TFSI]).

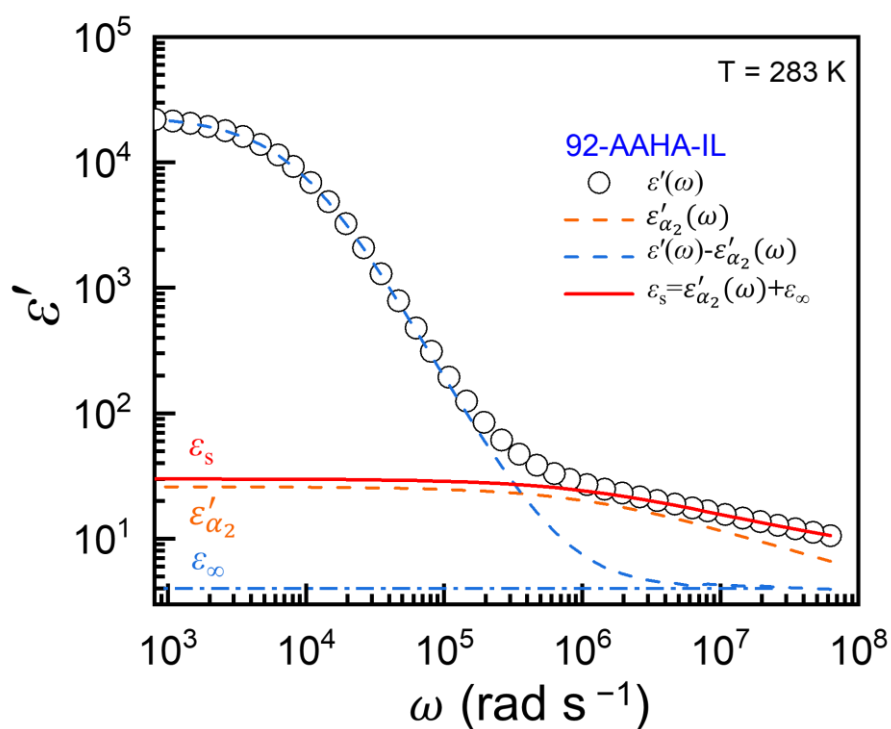

**Supplementary Fig. 15 Frequency dependent dielectric characteristics of 92-AAHA-IL.** Angular frequency dependence of dielectric permittivity  $\varepsilon'(\omega)$  of 92-AAHA-IL at 283 K and corresponding static dielectric constant  $\varepsilon_s$  (red solid line), determined as the sum of the frequency-dependent contributions from the  $\alpha_2$  process  $\varepsilon'_{\alpha_2}(\omega)$  (orange dashed line) and the high-frequency dielectric constant  $\varepsilon_\infty$  (blue dashed line).

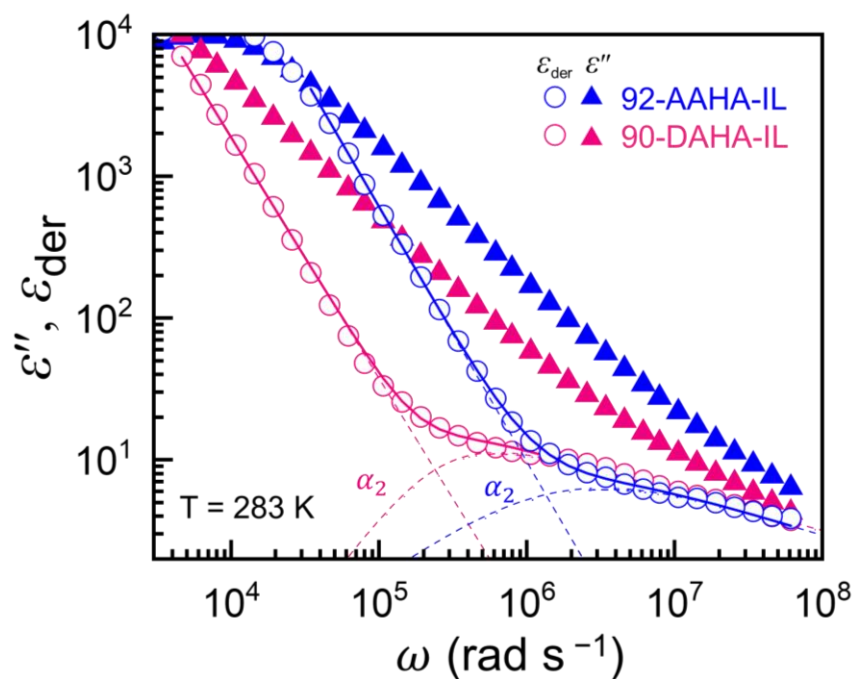

**Supplementary Fig. 16 Different  $\alpha_2$  process between ionic- and non-ionic polymer-based ionic conductors.** Derivative (open circles) and dielectric loss (filled triangles) spectra at 283 K and corresponding fits using a sum (solid line) of a power law for electrode polarization (dashed line) and a derivative form of the Havriliak-Negami function for the  $\alpha_2$  process (short dashed line).

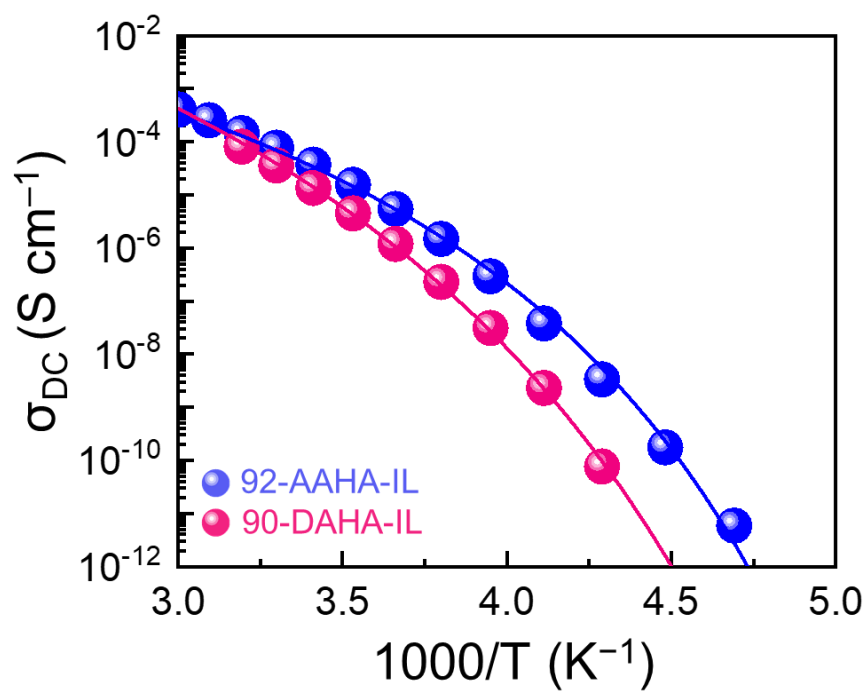

**Supplementary Fig. 17 Temperature dependent ionic conductivity.** Temperature dependence of ionic conductivity for 92-AAHA-IL and 90-DAHA-IL.

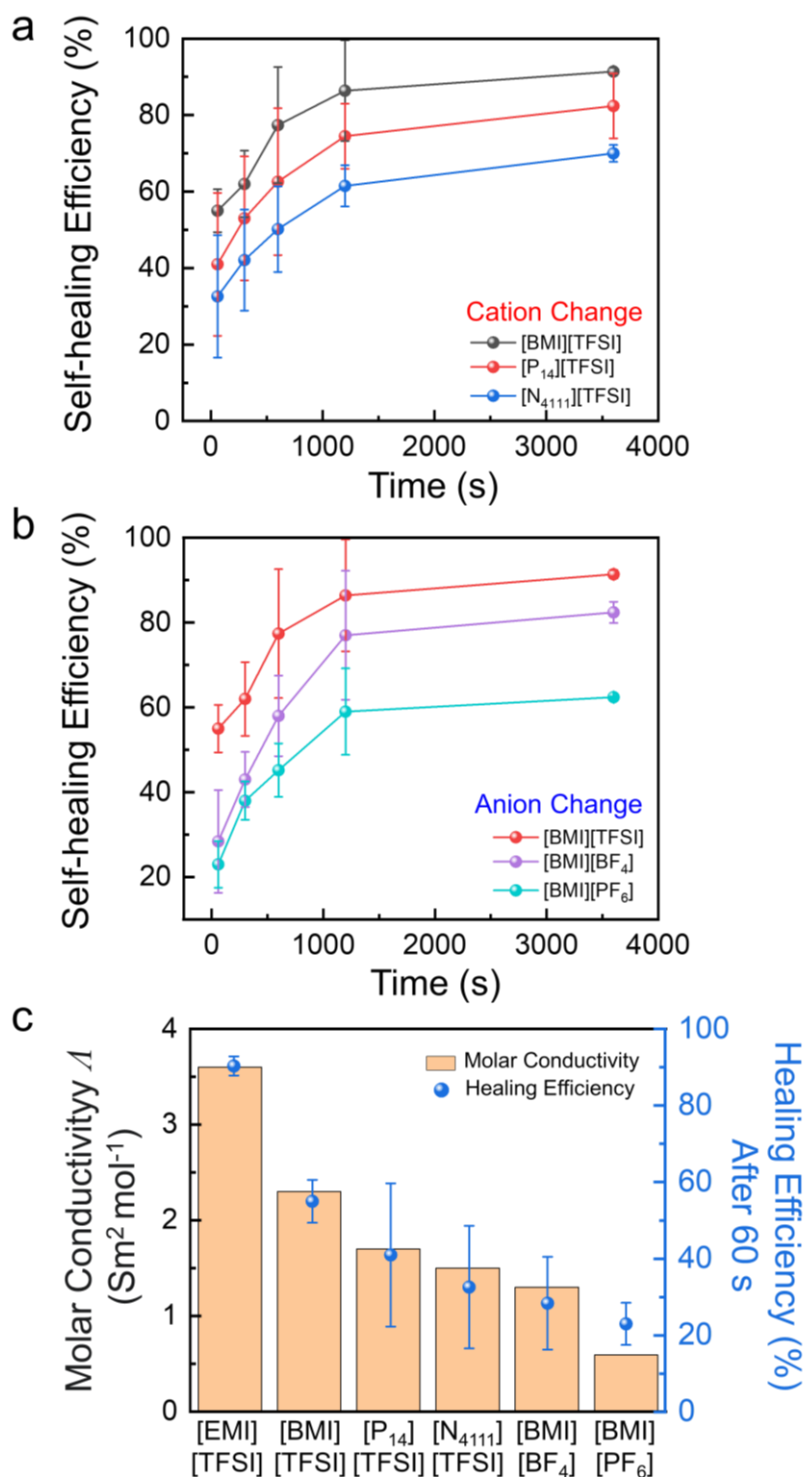

**Supplementary Fig. 18 Correlation between self-healing performance and type of ionic liquids.** Time-dependent self-healing efficiency of 92-AAHA-IL with selectively varied **a** cations and **b** anions of the ionic liquid. **c** Plots of molar conductivity ( $\Lambda$ ) and healing efficiency of ionic liquids at a repair time of 60 s. The  $\Lambda$  values were extracted from ref. 24. The self-healing processes of all ionic liquids were performed at 25 °C. Considering that a higher  $\Lambda$  of ionic liquids indicates an easier ion-ion dissociation and ion movement, the superior performance of the [EMI][TFSI]-containing 92-AAHA-IL can be rationalized in terms of the highest  $\Lambda$  of the ionic liquid additive. All error bars indicate standard deviation.

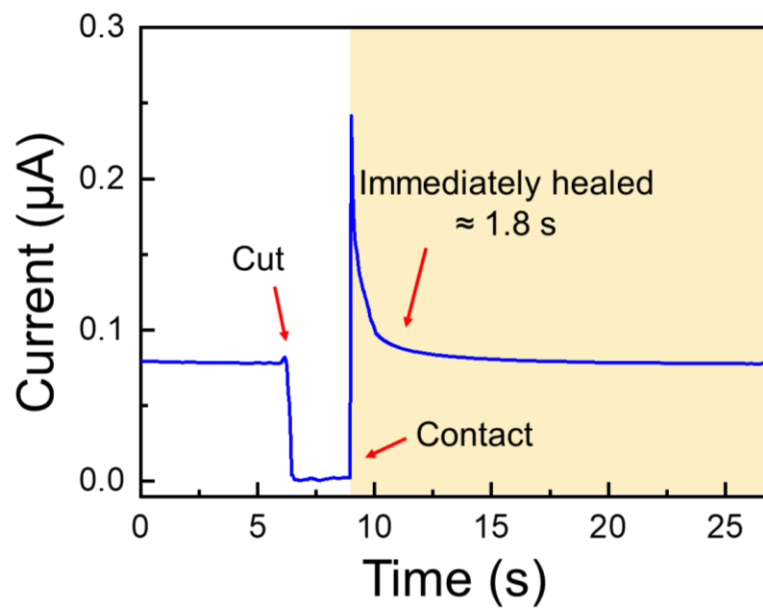

**Supplementary Fig. 19 Self-healing effect on electrical properties.** Self-healing of electrical properties of 92-AAHA-IL film. The flowing current was turned off when the film was cut in half, and was recovered immediately ( $\sim 1.8$  s) after reconnection.



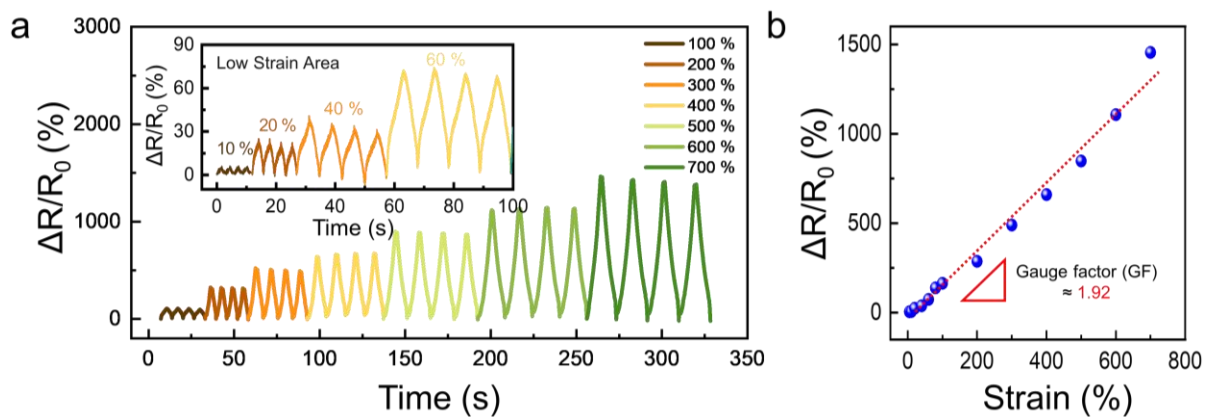

**Supplementary Fig. 20 Sensory performance of 92-AAHA-IL.** **a** Relative resistance variations ( $\Delta R/R_0$ ) under applied strains up to 700% (inset: relative resistance changes at 10, 20, 40, and 60% strains). **b** Variations in  $\Delta R/R_0$  over extended strain range, from which a GF value of  $\sim 1.92$  was extracted. It should be noted that the ionoconductors alone can serve as ionic sensing platforms with no additional components. Accordingly, strain-sensing platforms can be readily fabricated by simply connecting electronic wires.

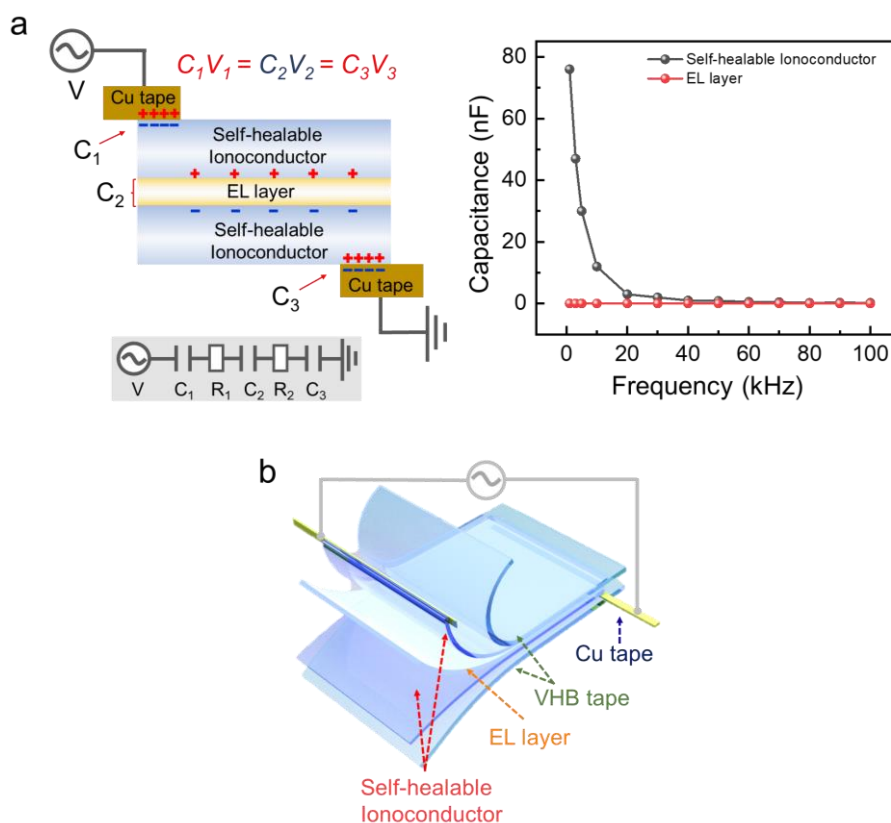

**Supplementary Fig. 21 Application of 92-AAHA-IL in AC electroluminescent displays (ACEDs).** **a** Schematic diagram (left) of ACED and capacitance variations (right) of each component (EL layer and 92-AAHA-IL-based ionoconductor). To construct electrical double layers (EDLs), Cu tape was attached to both sides of the ionoconductor. To avoid unnecessary interfacial electrochemical reactions, the EDL area ( $A_{EDL}$ ) was a small portion of the total area of the ionoconductor ( $A_{Ion}$ ). The EDL and dielectric layer acted as a series capacitor, following the equation:  $Q = C_1V_1 = C_2V_2 = C_3V_3$ , where  $Q$  is the charge, while  $C$  and  $V$  represent the corresponding capacitance and voltage of each layer, respectively.<sup>25,26</sup> Accordingly, the EL layer had a relatively lower capacitance than the EDLs in ionoconductors in a lower frequency range (0.1 to 60 kHz), and the applied voltage was centered on the phosphor layer ( $C_1/C_2$  or  $C_3/C_2 \approx 1.8 \times 10^4$ ). **b** Schematic illustration of ACED. The EL device had a three-layer configuration where the EL phosphor layer was sandwiched between two symmetric ionoconductor layers.

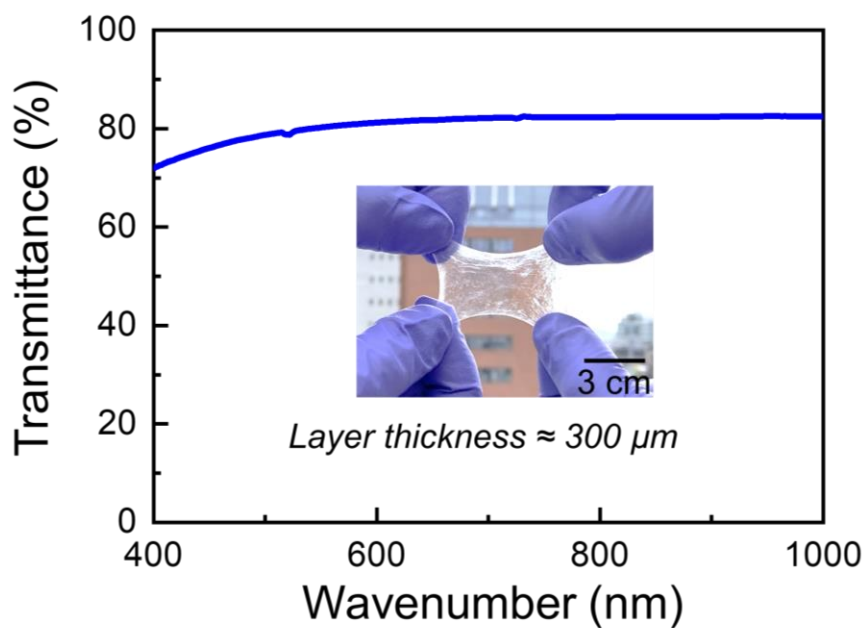

**Supplementary Fig. 22 Optical transparency of 92-AAHA-IL.** Transmittance spectrum of 300  $\mu\text{m}$ -thick 92-AAHA-IL film at various wavenumbers. The overall transmittance values were higher than  $\sim 70\%$  at 400–1100 nm.

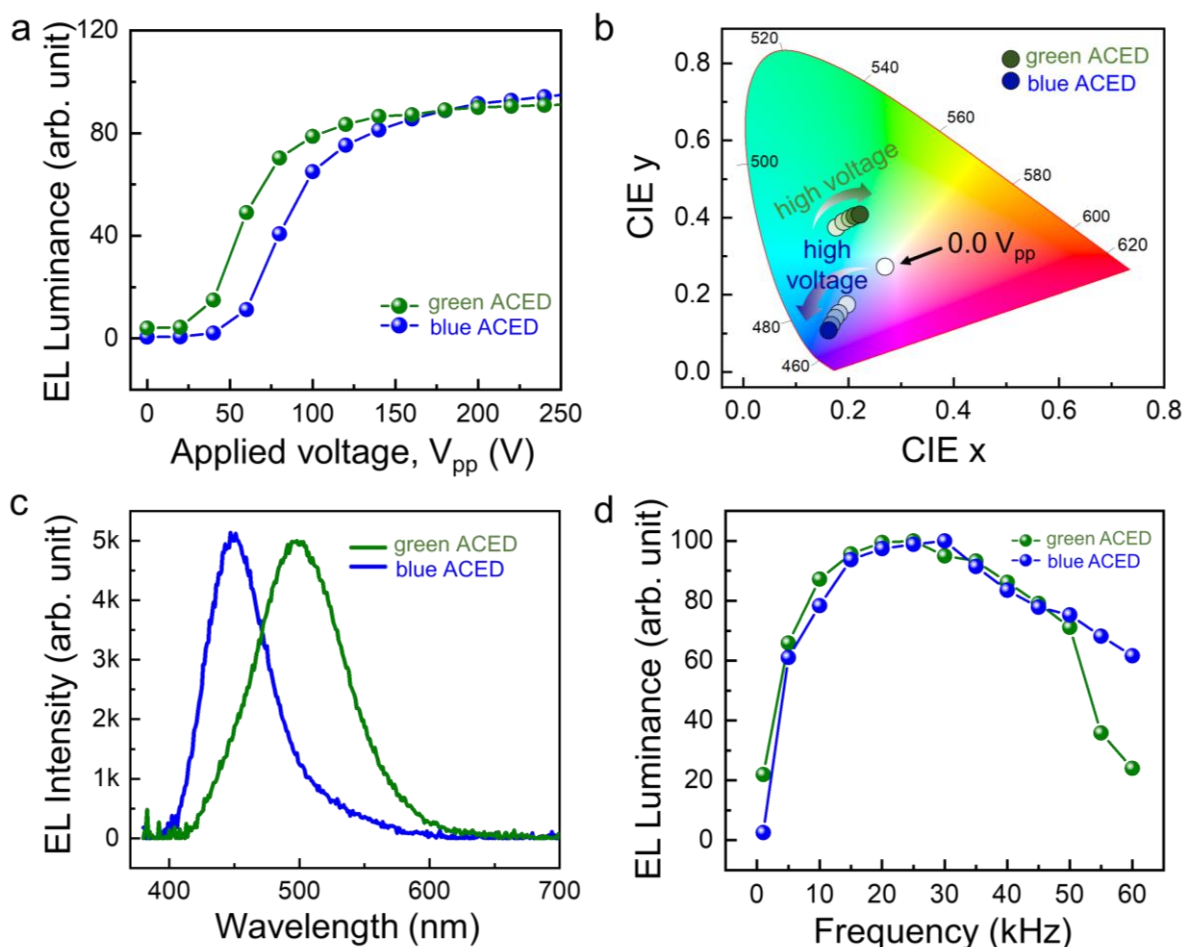

**Supplementary Fig. 23 Characteristics of AC electroluminescent displays (ACEDs).** **a** Luminance *versus* voltage characteristics and **b** CIE color coordinates of blue- and green-emitting ACED as a function of AC voltage at a frequency of 25 kHz. **c** EL emission spectra and **d** frequency dependence of EL luminance at an applied voltage of 200  $V_{pp}$ . The magnitude of the emission intensity was linearly related to the driving voltage power from the turn-on voltage ( $\sim 40 V_{pp}$ ) to the saturation of both EL brightness above 200  $V_{pp}$  (Supplementary Fig. 23a). Each green- and blue-emitting luminophore successfully served as a deep color-brightening ACED upon applying various voltages (Supplementary Fig. 23b). The normalized EL spectra of the ACEDs confirmed the blue and green emission with maximum EL wavelengths at  $\sim 450$  and  $\sim 500$  nm (Supplementary Fig. 23c). The analysis of the frequency dependence showed that the EL intensity rapidly increased up to 25 kHz at the applied voltage of 200  $V_{pp}$  (Supplementary Fig. 23d). However, further frequency increases (above 30 kHz) resulted in a steady reduction in luminance, due to the decrease in the electron acceleration.<sup>27</sup> Therefore, the operating conditions of ACEDs were optimized at an applied voltage of 200  $V_{pp}$  and a frequency of 25 kHz to synchronize the green- and blue-emitting systems.

**a** Sub-zero  
Temperature Healing

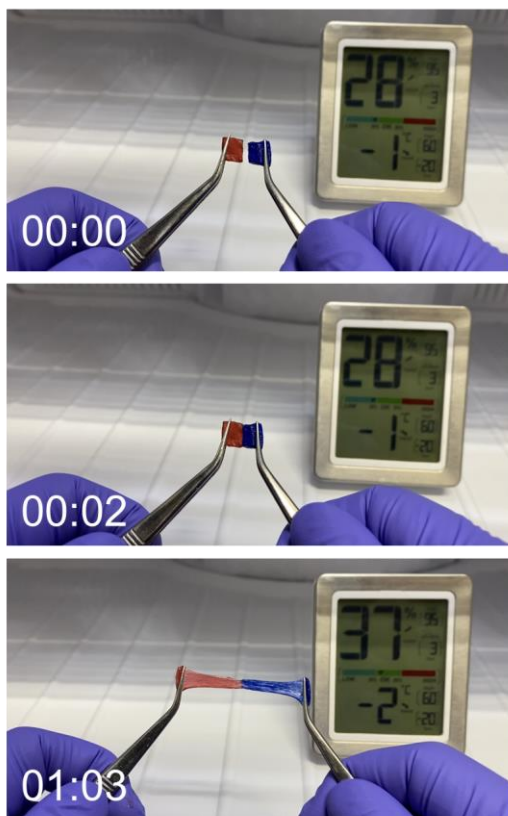

**b** Underwater Healing

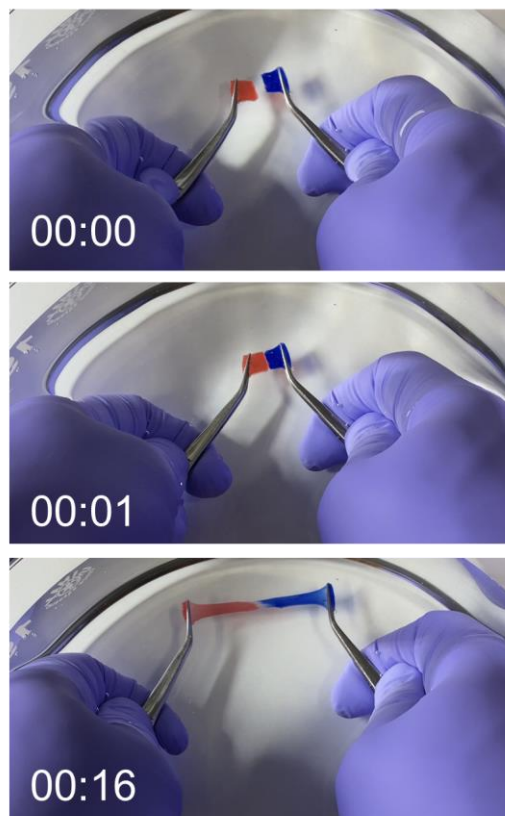

**Supplementary Fig. 24 Successful self-healing in various conditions.** Successful self-healing of 92-AAHA-IL in extreme environments: **a** sub-zero temperature and **b** underwater environment.

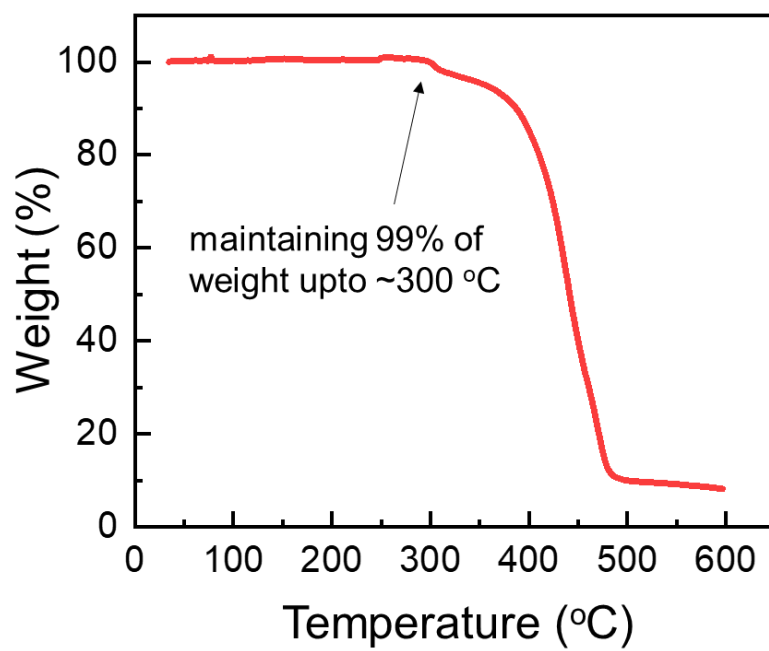

**Supplementary Fig. 25 Thermal stability of 92-AAHA-IL.** TGA thermogram of 92-AAHA-IL, indicating its high thermal stability up to ~300 °C.

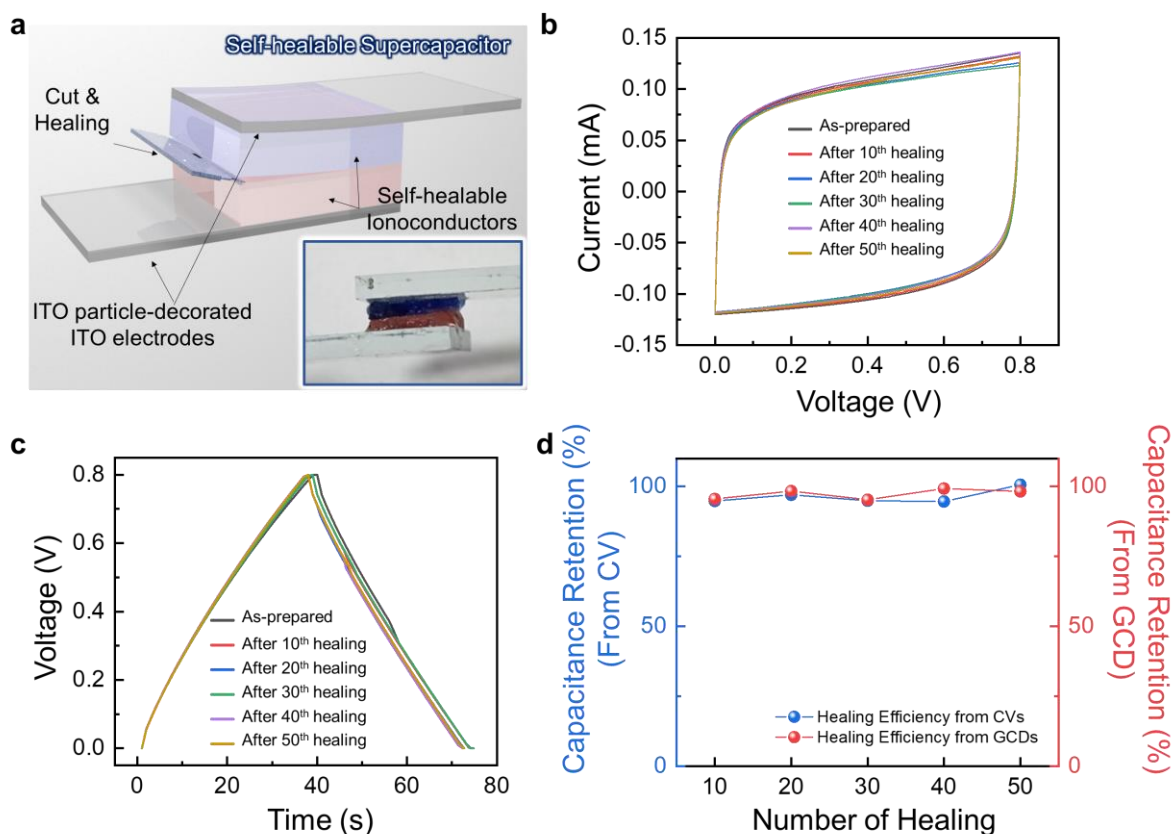

**Supplementary Fig. 26 Utilization of ultrafast self-healing performance of 92-AAHA-IL in healable supercapacitors.** **a** Schematic illustration of self-healable ionoconductor-based electrical double layer capacitor (EDLC). The inset displays a photograph of the actual device. **b** Cyclic voltammograms at a scan rate of  $25 \text{ mV s}^{-1}$  during self-healing cycles. The areal capacitance ( $C$ ) was calculated using the following equation:<sup>28</sup>  $C = \frac{1}{\Delta V(dV/dt)} \int I dV$ , where  $dV/dt$  and  $\int I dV$  are the voltage scan rate and the numerical integration of the current density in the half-cycle potential window ( $\Delta V$ ), respectively. **c** Galvanostatic charge-discharge (GCD) profiles at a current density of  $0.1 \text{ mA cm}^{-2}$ . The  $C$  values were extracted using the equation<sup>29</sup>  $C = I\Delta t/S\Delta V$ , where  $I$ ,  $\Delta t$ ,  $S$ , and  $\Delta V$  represent the discharging current, discharging time, electrode area, and potential window excluding the  $IR$  voltage drop, respectively. **d** Variation in capacitance retention ( $C/C_0$ ) as a function of number of healing cycles. A high  $C/C_0$  was maintained irrespective of the number of self-healing cycles, demonstrating the practical applicability of 92-AAHA-IL in self-healable energy storage devices.

## Supplementary References

- [1] Dai, X. et al. A mechanically strong, highly stable, thermoplastic, and self-healable supramolecular polymer hydrogel. *Adv. Mater.* **27**, 3566–3571 (2015).
- [2] Jeon, I. et al. Extremely stretchable and fast self-healing hydrogels. *Adv. Mater.* **28**, 4678–4683 (2016).
- [3] Gulyuz, U. et al. Self-healing poly(acrylic acid) hydrogels with shape memory behavior of high mechanical strength. *Macromolecules* **47**, 6889–6899 (2014).
- [4] Zhang, Y. et al. Unique self-reinforcing and rapid self-healing polyampholyte hydrogels with a pH-induced shape memory effect. *Macromolecules* **54**, 5218–5228 (2021).
- [5] Ihsan, A. B. et al. Self-healing behaviors of tough polyampholyte hydrogels. *Macromolecules* **49**, 4245–4252 (2016).
- [6] Wang, L. et al. Tough, adhesive, self-healable, and transparent ionically conductive zwitterionic nanocomposite hydrogels as skin strain sensors. *ACS Appl. Mater. Interfaces* **11**, 3506–3515 (2019).
- [7] Lei, J. et al. Facile fabrication of biocompatible gelatin-based self-healing hydrogels. *ACS Appl. Polym. Mater.* **1**, 1350–1358 (2019).
- [8] Wu, M. et al. Ultra elastic, stretchable, self-healing conductive hydrogels with tunable optical properties for highly sensitive soft electronic sensors. *J. Mater. Chem. A* **8**, 24718–24733 (2020).
- [9] Long, T. et al. Salt-mediated polyampholyte hydrogels with high mechanical strength, excellent self-healing property, and satisfactory electrical conductivity. *Adv. Funct. Mater.* **28**, 1804416 (2018).
- [10] Chen, X. et al. Extremely tough, puncture-resistant, transparent, and photoluminescent polyurethane elastomers for crack self-diagnose and healing tracking. *ACS Appl. Mater. Interfaces* **12**, 30847–30855 (2020).
- [11] Li, J. et al. Seawater-assisted self-healing of catechol polymers via hydrogen bonding and coordination interactions. *ACS Appl. Mater. Interfaces* **8**, 19047–19053 (2016).
- [12] Li, R. et al. Autonomous self-healing, antifreezing, and transparent conductive elastomers. *Chem. mater.* **32**, 874–881 (2020).
- [13] Li, X. et al. Self-healing polyurethane elastomers based on a disulfide bond by digital light processing 3D printing. *ACS Macro Lett.* **8**, 1511–1516 (2019).
- [14] Ying, W. B. et al. A biologically muscle-inspired polyurethane with super-tough, thermal repairable and self-healing capabilities for stretchable electronics. *Adv. Funct. Mater.* **31**, 2009869 (2021).
- [15] Xu, W. M. et al. Sunlight driven self-healing, reshaping and recycling of a robust, transparent and yellowing-resistant polymer. *J. Mater. Chem. A* **4**, 10683–10690 (2016).
- [16] Li, C.-H. et al. A highly stretchable autonomous self-healing elastomer. *Nat. Chem.* **8**, 618–624 (2016).
- [17] Zhu, M. et al. Long-lasting sustainable self-healing ion gel with triple-network by trigger-free dynamic hydrogen bonds and ion bonds. *ACS Sustain. Chem. Eng.* **6**, 17087–17098 (2018).



- [18] Tamate, R. et al. Self-healing micellar ion gels based on multiple hydrogen bonding. *Adv. Mater.* **30**, 1802792 (2018).
- [19] Saruwatari, A. et al. Photohealable ion gels based on the reversible dimerisation of anthracene. *Chem. Commun.* **54**, 13371–13374 (2018).
- [20] Ueki, T. et al. Thermally reversible ion gels with photohealing properties based on triblock copolymer self-assembly. *Macromolecules* **48**, 5928–5933 (2015).
- [21] Cao, Y. et al. A transparent, self-healing, highly stretchable ionic conductor. *Adv. Mater.* **29**, 1605099 (2017).
- [22] Cao, Y. et al. Self-healing electronic skins for aquatic environments. *Nat. Electron.* **2**, 75–82 (2019).
- [23] Zhao, D. et al. A dynamic gel with reversible and tunable topological networks and performances. *Matter* **2**, 390–403 (2020).
- [24] Tokuda, H. et al. How ionic are room-temperature ionic liquids? an indicator of the physicochemical properties. *J. Phys. Chem. B* **110**, 19593–19600 (2006).
- [25] Wang, J. et al. Extremely stretchable electroluminescent devices with ionic conductors. *Adv. Mater.* **28**, 4490–4496 (2016).
- [26] Xuan, H. D. et al. Super stretchable and durable electroluminescent devices based on double-network ionogels. *Adv. Mater.* **33**, 2008849 (2021).
- [27] Liang, G. et al. Self-healable electroluminescent devices. *Light-Sci. Appl.* **7**, 102 (2018).
- [28] Allagui, A. et al. Reevaluation of Performance of Electric Double-layer Capacitors from Constant-current Charge/Discharge and Cyclic Voltammetry. *Sci. Rep.* **6**, 38568 (2016).
- [29] Kim, S. Y. et al. Reliable, high-performance electrochromic supercapacitors based on metal-doped nickel oxide. *ACS Appl. Mater. Interfaces* **12**, 51978–51986 (2020).
