# Supplementary material for: Ion-cluster-mediated ultrafast self-healable ionoconductors for reconfigurable electronics
Source: PubMed Central journal article supplement (PMC9247092; doi:10.1038/s41467-022-31553-4), 2022-06-30
Supplement: 41467_2022_31553_MOESM3_ESM.pdf [file 41467_2022_31553_MOESM3_ESM.pdf]

### **Description of Additional Supplementary Files**

File Name: Supplementary Movie 1

Description: This movie shows the superior self-healing performance of 92-AAHA-IL demonstrated by blocking picometer-sized nitrogen gas molecules after self-healing.

File Name: Supplementary Movie 2

Description: This movie demonstrates the ultra-fast self-healing capacity of the 92-AAHA-IL-based ionoconductor.

File Name: Supplementary Movie 3

Description: This movie shows the facile fabrication of a multi-color emitting ACED by simply connecting two ACEDs.

File Name: Supplementary Movie 4

Description: This movie illustrates the application of the self-healing properties in a pixelated ACED. Square-shaped ACEDs with green- and blue-emissive layers (10 mm length  $\times$  10 mm width  $\times$  700  $\mu\text{m}$  thickness) were connected to form a 3 $\times$ 3 pixelated ACED. After self-healing, the pixelated ACED successfully operated under various deformations. This highlights the great potential of the present systems in reconfigurable displays.

File Name: Supplementary Movie 5

Description: This movie demonstrates the self-healing capacity of 92-AAHA-IL in sub-zero temperature conditions.

File Name: Supplementary Movie 6

Description: This movie demonstrates the self-healing capacity of 92-AAHA-IL underwater environments.
